# Supplementary material
Source: MDPI journal article supplement (https://www.mdpi.com/2073-4344/13/2/437)
Supplement: s1 [file s1]

## Supplementary Materials

**Table S1.** Chemical composition (Ni<sub>2</sub>P content) of Ni<sub>2</sub>P/P-GCN catalysts.

| Sample                      | N<br>(at. %) | Ni<br>(at. %) | P<br>(at. %) | Ni <sub>2</sub> P content<br>(wt.%) |
|-----------------------------|--------------|---------------|--------------|-------------------------------------|
| 5-Ni <sub>2</sub> P/P-GCN   | 97.30        | 1.50          | 1.20         | 4.7                                 |
| 10-Ni <sub>2</sub> P/P-GCN  | 95.18        | 3.34          | 1.48         | 10.2                                |
| 15-Ni <sub>2</sub> P/P-GCN  | 91.55        | 4.91          | 3.54         | 14.8                                |
| 20-Ni <sub>2</sub> P/P-GCN  | 90.19        | 6.79          | 3.02         | 19.5                                |
| 15-Ni <sub>2</sub> P/GCN_b  | 92.10        | 4.84          | 3.06         | 14.5                                |
| 15-Ni <sub>2</sub> P/P-GCN* | 93.03        | 4.91          | 2.06         | 14.6                                |

\*Sample retrieved after catalytic recycle tests.

**Table S2.** Textural properties and energy band gap of GCN\_b, GCN, P-GCN and Ni<sub>2</sub>P/P-GCN materials.

| Sample                     | BET surface area<br>(m <sup>2</sup> g <sup>-1</sup> ) | Pore volume<br>(cm <sup>3</sup> g <sup>-1</sup> ) | Pore size<br>(nm) | Band gap<br>(eV) |
|----------------------------|-------------------------------------------------------|---------------------------------------------------|-------------------|------------------|
| GCN_b                      | 83                                                    | 0.12                                              | 3.0               | 2.75             |
| GCN nanosheets             | 113                                                   | 0.18                                              | 3.4               | 2.81             |
| P-GCN nanosheets           | 97                                                    | 0.20                                              | 3.1               | 2.76             |
| 5-Ni <sub>2</sub> P/P-GCN  | 92                                                    | 0.15                                              | 3.2               | 2.74             |
| 10-Ni <sub>2</sub> P/P-GCN | 84                                                    | 0.14                                              | 3.3               | 2.74             |
| 15-Ni <sub>2</sub> P/P-GCN | 75                                                    | 0.12                                              | 3.3               | 2.73             |
| 20-Ni <sub>2</sub> P/P-GCN | 68                                                    | 0.14                                              | 3.3               | 2.70             |

**Table S3.** Comparison of photocatalytic efficiency between 15-Ni<sub>2</sub>P/P-GCN and other reported g-C<sub>3</sub>N<sub>4</sub>-based photocatalysts.

| Photocatalyst                                              | Reaction conditions                                                                                                                                                            | Photocatalytic degradation of Cr(VI) |            | Ref. |
|------------------------------------------------------------|--------------------------------------------------------------------------------------------------------------------------------------------------------------------------------|--------------------------------------|------------|------|
|                                                            |                                                                                                                                                                                | C <sub>t</sub> /C <sub>0</sub>       | Time (min) |      |
| Biochar(40)/g-C <sub>3</sub> N <sub>4</sub> NSs            | 50 mg catalyst, 50 mL Cr(VI) solution (10 mg L <sup>-1</sup> ), 4-fluorophenol, 300 W Xe lamp ( $\lambda > 420$ nm), pH=2                                                      | ~70%                                 | 240        | [59] |
| 3.0 wt.% g-C <sub>3</sub> N <sub>4</sub> /MIL-53(Fe)       | 20 mg catalyst, 50 mL Cr(VI) solution (10 mg L <sup>-1</sup> ), 500 W Xe lamp, (420 < $\lambda$ < 760 nm), pH=3                                                                | 100%                                 | 180        | [60] |
| Black P QDs/g-C <sub>3</sub> N <sub>4</sub>                | 50 mg catalyst, 50 mL K <sub>2</sub> Cr <sub>2</sub> O <sub>7</sub> solution (10 mg L <sup>-1</sup> ), 300 W Xe lamp, ( $\lambda > 420$ nm), pH=4.65                           | ~95%                                 | 60         | [61] |
| Porous (P, Mo)-doped/g-C <sub>3</sub> N <sub>x</sub>       | 0.05 g catalyst, 40 mL K <sub>2</sub> Cr <sub>2</sub> O <sub>7</sub> aqueous solution (100 mg/L), 0.03 g tartaric acid, 300 W xenon lamp equipped with a 420 nm cut-off filter | ~95%                                 | 120        | [62] |
| P-doped g-C <sub>3</sub> N <sub>4</sub> /SnS (30 wt.% SnS) | 50 mg catalyst, 100 mL of K <sub>2</sub> Cr <sub>2</sub> O <sub>7</sub> (100 mg L <sup>-1</sup> ) solution, solar simulator with a low-pass cutoff filter (440 nm), pH=2       | 100%                                 | 60         | [63] |

|                                                                          |                                                                                                                                                                                                            |       |     |              |
|--------------------------------------------------------------------------|------------------------------------------------------------------------------------------------------------------------------------------------------------------------------------------------------------|-------|-----|--------------|
| HNO <sub>3</sub> -treated g-C <sub>3</sub> N <sub>4</sub>                | 300 mg catalyst, 300 mL of 50 mg/L K <sub>2</sub> Cr <sub>2</sub> O <sub>7</sub> aqueous solution, 1 mL of 100 mg/mL citric acid aqueous solution, visible-light ( $\lambda > 420$ nm) irradiation, pH=3.2 | 100%  | 240 | [64]         |
| CoS <sub>2</sub> /g-C <sub>3</sub> N <sub>4</sub> -rGO                   | 10 mg catalyst, Cr(VI)-containing aqueous solution (20 mg/L, 20 mL) 350 W Xe lamp, pH=2                                                                                                                    | 99.8% | 120 | [65]         |
| Hydrothermal treated g-C <sub>3</sub> N <sub>4</sub>                     | 300 mg catalyst, 300 mL of 50 mg/L K <sub>2</sub> Cr <sub>2</sub> O <sub>7</sub> aqueous solution, 1 mL of 100 mg/mL citric acid aqueous solution, visible-light ( $\lambda > 420$ nm) irradiation, pH=3.1 | 100%  | 150 | [66]         |
| Fe <sup>0</sup> -doped g-C <sub>3</sub> N <sub>4</sub> /MoS <sub>2</sub> | 30 mg catalyst, 50 mL Cr(VI) solution (20 mg L <sup>-1</sup> ), RhB, 500 W Xe lamp ( $\lambda > 420$ nm)                                                                                                   | 91%   | 120 | [67]         |
| O and S co-doped g-C <sub>3</sub> N <sub>4</sub> /Ni <sub>2</sub> P      | 50 mg catalyst, 100 mL Cr(VI) (10 mg L <sup>-1</sup> ), 50 mg citric acid, 300 W Xe lamp ( $\lambda > 420$ nm)                                                                                             | 100 % | 120 | [68]         |
| 15-Ni <sub>2</sub> P/P-GCN                                               | 40 mg catalyst, 50 mL Cr(VI) solution (50 mg L <sup>-1</sup> ), 300 W Xe lamp, $\lambda > 360$ nm, pH=2                                                                                                    | >99%  | 80  | In this work |

**Table S4.** PL lifetime biexponential decay model fitting parameters and calculated average carrier lifetimes for the GCN<sub>b</sub>, GCN, P-GCN and Ni<sub>2</sub>P-modified catalysts with 15 wt.% Ni<sub>2</sub>P content.

| Sample                                | $\tau_1$<br>(ns) | $\tau_2$<br>(ns) | $\alpha_1$<br>(%) | $\alpha_2$<br>(%) | $\tau_{av}$<br>(ns) |
|---------------------------------------|------------------|------------------|-------------------|-------------------|---------------------|
| GCN <sub>b</sub>                      | 1.07             | 5.26             | 62.5              | 37.5              | 4.20                |
| GCN                                   | 1.50             | 5.51             | 59.0              | 41.0              | 4.38                |
| P-GCN                                 | 1.21             | 5.21             | 55.1              | 44.9              | 4.32                |
| 15-Ni <sub>2</sub> P/P-GCN            | 2.03             | 6.58             | 60.8              | 39.2              | 5.11                |
| 15-Ni <sub>2</sub> P/GCN <sub>b</sub> | 1.10             | 4.80             | 63.2              | 36.8              | 3.76                |

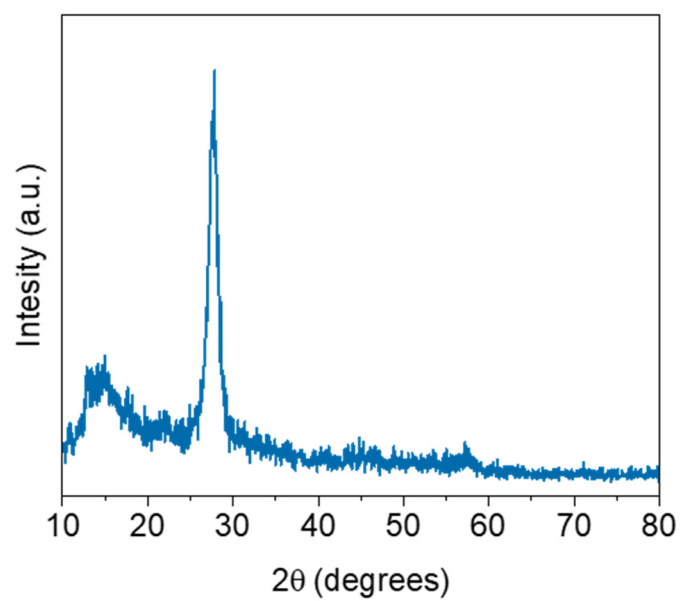

**Figure S1.** XRD pattern of P-doped  $\text{g-C}_3\text{N}_4$  (P-GCN). The broad feature at  $\sim 14.8^\circ$   $2\theta$  possibly comes from the unreacted phosphorus remained on the surface of  $\text{g-C}_3\text{N}_4$ .

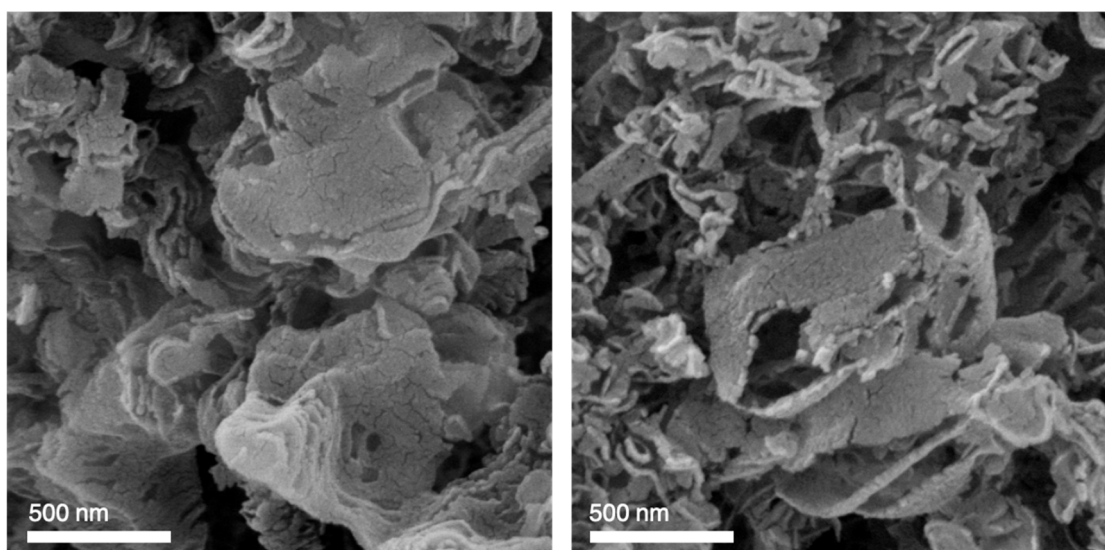

**Figure S2.** Typical FE-SEM images of as-made  $\text{g-C}_3\text{N}_4$  (GCN\_b).

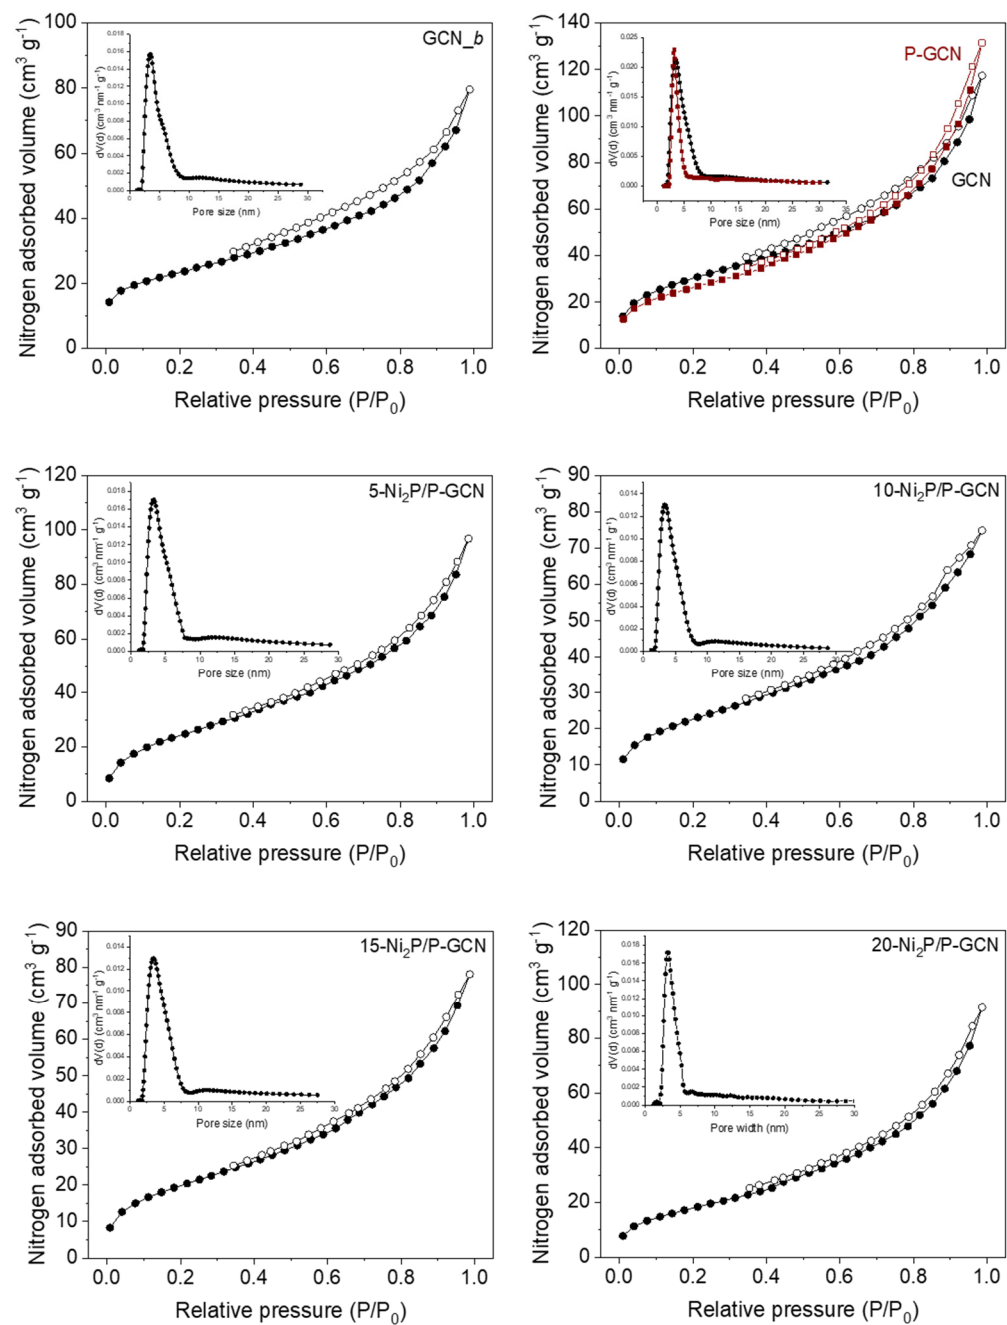

**Figure S3.**  $\text{N}_2$  adsorption (filled cycles) and desorption (open cycles) isotherms at  $-196^\circ\text{C}$  and the corresponding NLDFT pore-size distribution plots (Insets) for the GCN\_b, GCN, P-GCN and  $\text{Ni}_2\text{P/P-GCN}$  catalysts.

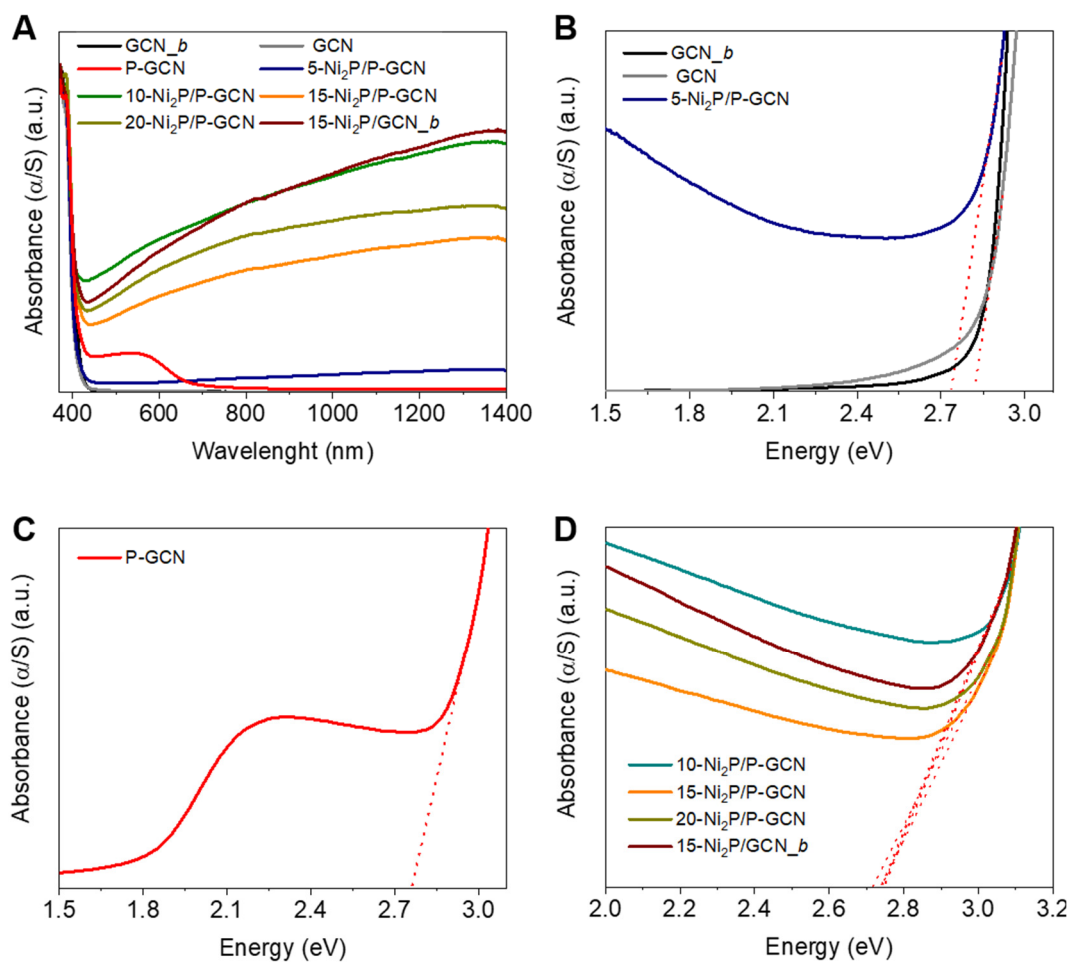

**Figure S4.** UV-vis/NIR absorption spectra versus wavelength (A) and photon energy (B-D) of the GCN<sub>b</sub>, GCN and  $\text{Ni}_2\text{P}/\text{P-GCN}$  and  $15\text{-Ni}_2\text{P}/\text{GCN}_b$  materials.

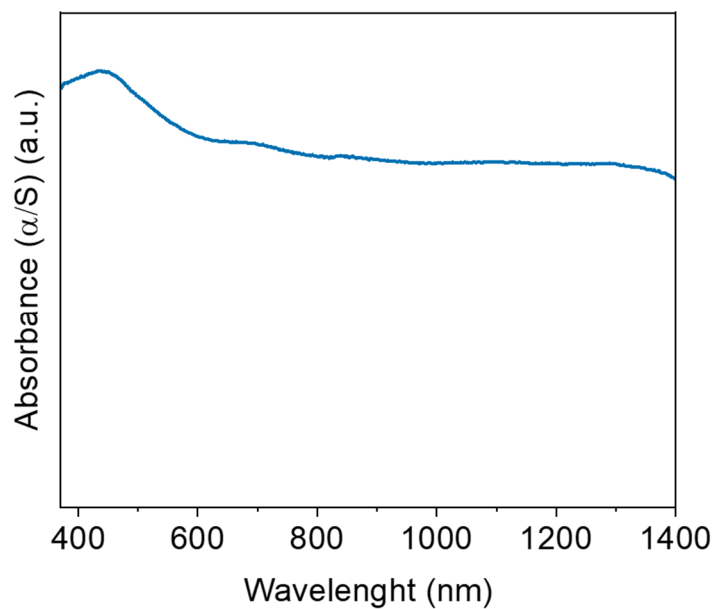

**Figure S5.** UV-vis/NIR absorption spectrum of the  $\text{Ni}_2\text{P}$  particles.

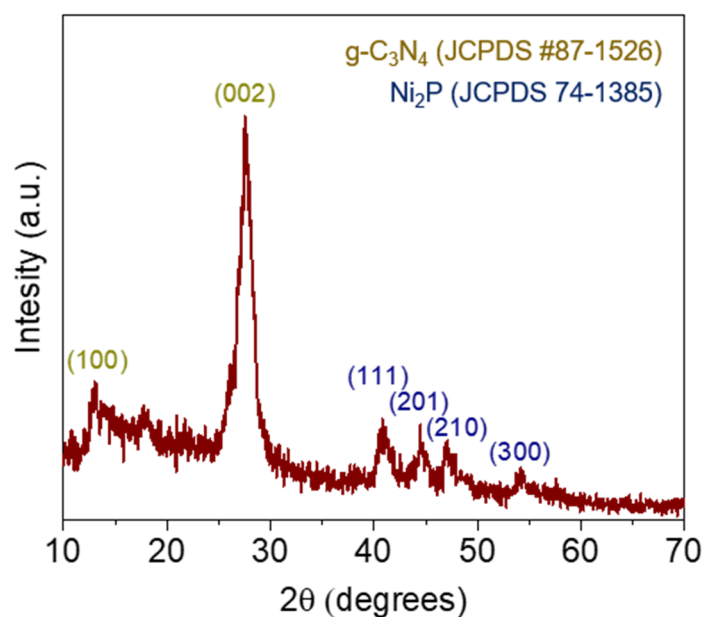

**Figure S6.** XRD pattern of the 15-Ni<sub>2</sub>P/GCN\_b catalyst.

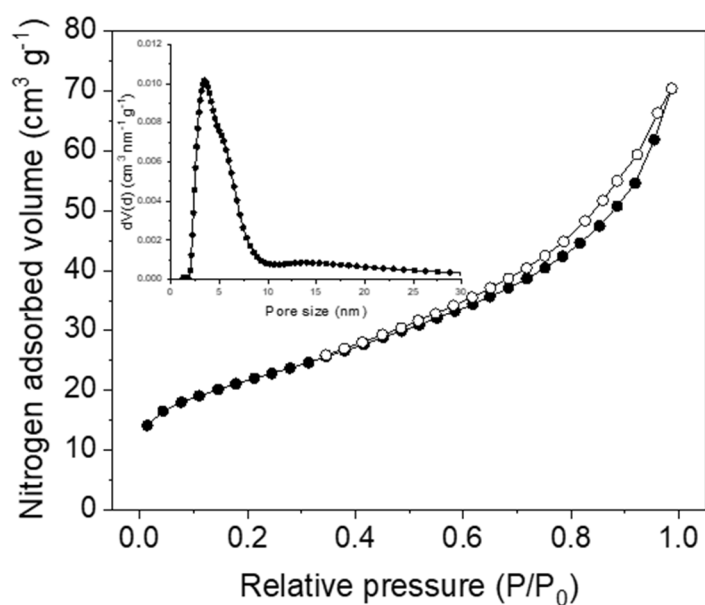

**Figure S7.** N<sub>2</sub> adsorption (filled cycles) and desorption (open cycles) isotherms –196 °C and the corresponding NLDFT pore-size distribution plot (Inset) for the 15-Ni<sub>2</sub>P/GCN\_b catalyst. Analysis of the adsorption branch with the BET method gives surface area of 76 m<sup>2</sup>g<sup>–1</sup> and total pore volume of 0.11 cm<sup>3</sup>g<sup>–1</sup>. NLDFT pore size distribution calculated from the adsorption branch shows a maximum pore diameter of 3.5 nm.

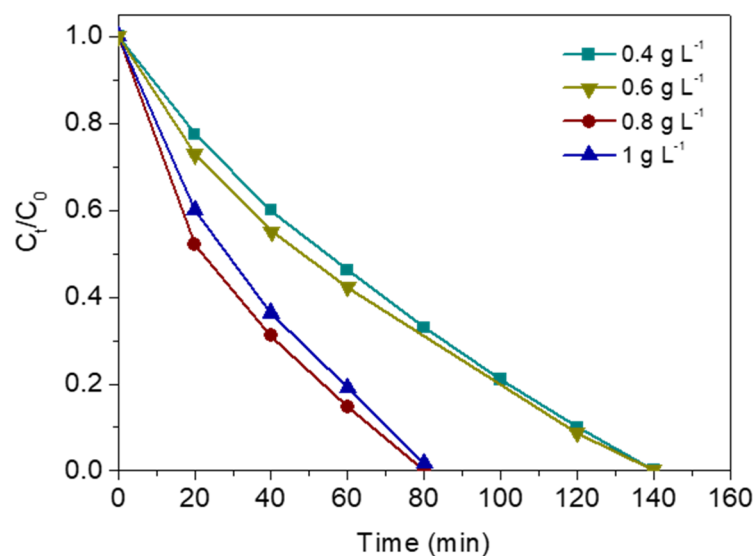

**Figure S8.** Concentration dependent photocatalytic Cr(VI) reduction activity of 15-Ni<sub>2</sub>P/P-GCN catalyst. Reaction conditions: 0.4–1 g L<sup>-1</sup> of catalyst, 50 mg L<sup>-1</sup> Cr(VI) aqueous solution, pH = 2, UV-visible light ( $\lambda > 360$  nm) irradiation, 20 °C.

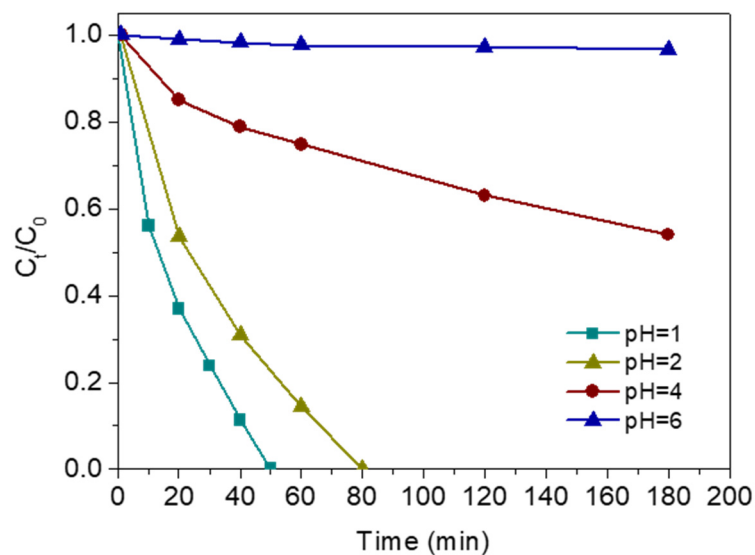

**Figure S9.** Effect of the solution pH on the photocatalytic Cr(VI) reduction performance. The photocatalytic reactions were performed as follows: 0.8 g L<sup>-1</sup> catalyst, 50 mg L<sup>-1</sup> Cr(VI) solution, pH = 2,  $\lambda > 360$  nm light irradiation, 20 °C. The pH of the solution was adjusted with 2 M H<sub>2</sub>SO<sub>4</sub> or 2 M NaOH.

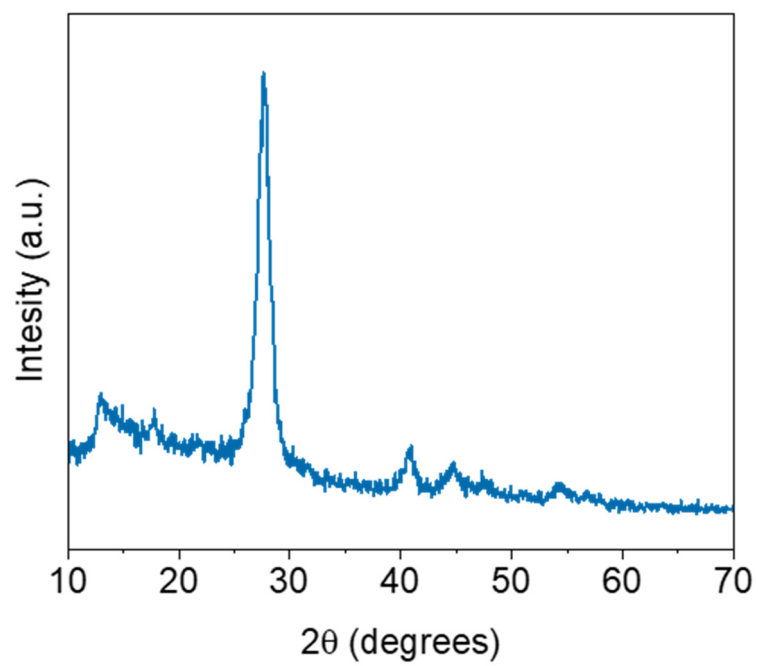

**Figure S10.** XRD pattern of the 15-Ni<sub>2</sub>P/P-GCN catalyst after photocatalytic recycle tests.
